# Supplementary material for: Decreased Npas4 and Arc mRNA Levels in the Hippocampus of Aged Memory‐Impaired Wild‐Type But Not Memory Preserved 11β‐HSD1 Deficient Mice
Source: PubMed Central journal article supplement (PMC4737280; doi:10.1111/jne.12339), 2016-01-17
Supplement: JNE-28-0-s001.pdf [file JNE-28-0-s001.pdf]

## Supplementary Information

### **Decreased *Npas4* and *Arc* mRNA levels in the hippocampus of aged memory-impaired wild type but not memory preserved 11 $\beta$ -HSD1 deficient mice**

Jing Qiu <sup>a</sup>, Donald R. Dunbar <sup>a, †</sup>, June Noble <sup>a</sup>,Carolynn Cairns <sup>a</sup>, Rod Carter <sup>a</sup>, Val Kelly <sup>a</sup>, Karen E. Chapman <sup>a</sup>, Jonathan R. Seckl <sup>a, b</sup>, Joyce L.W. Yau <sup>a, b, \*</sup>

<sup>a</sup>BHF Centre for Cardiovascular Science, University of Edinburgh, UK

<sup>b</sup>Centre for Cognitive Ageing and Cognitive Epidemiology, University of Edinburgh, UK

\* Corresponding author:

Dr Joyce LW Yau,  
BHF Centre for Cardiovascular Science,  
The Queen's Medical Research Institute,  
47 Little France Crescent, Edinburgh EH16 4TJ, UK.  
Tel: +44 (0) 131 242 6760  
Fax: +44 (0) 131 242 6779  
E-mail: [Joyce.Yau@ed.ac.uk](mailto:Joyce.Yau@ed.ac.uk)

<sup>†</sup> Present address: Sismic Ltd, West of Scotland Science Park, Glasgow G20 OSP

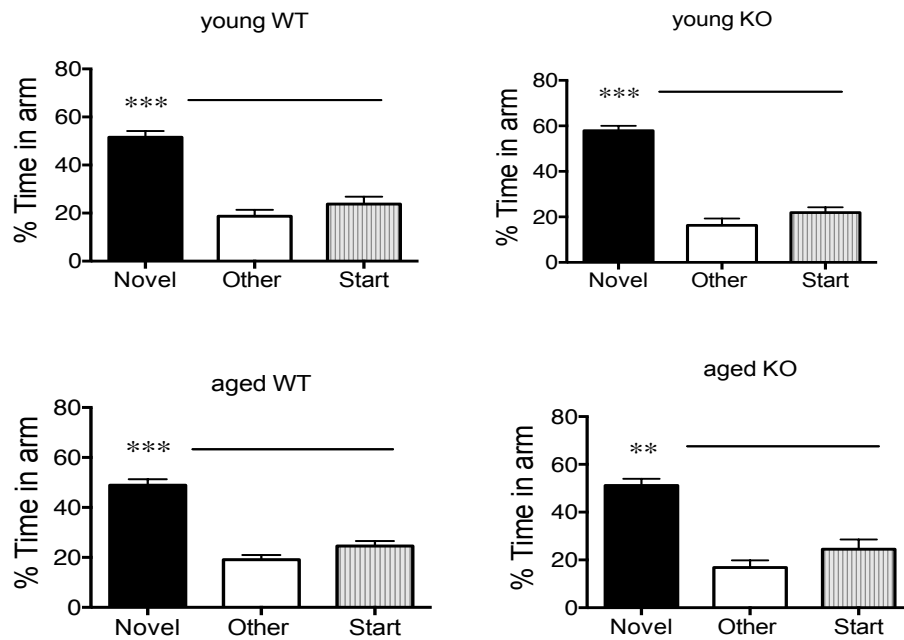

**Figure S1. Initial assessment of young and aged wild-type and 11 $\beta$ -HSD1-deficient mice in the Y-maze following a 1 min inter-trial interval (ITI).** All young (6 months, n=9/genotype) and aged (24 months, wild-type (WT) (n=13); *Hsd11b1*<sup>-/-</sup> (KO) (n=8)) mice showed a preference for the novel arm after a 1min ITI. \*\*\* P<0.001; \*\*P<0.01 compared to other and start arms. Data shown are mean  $\pm$  SEM.

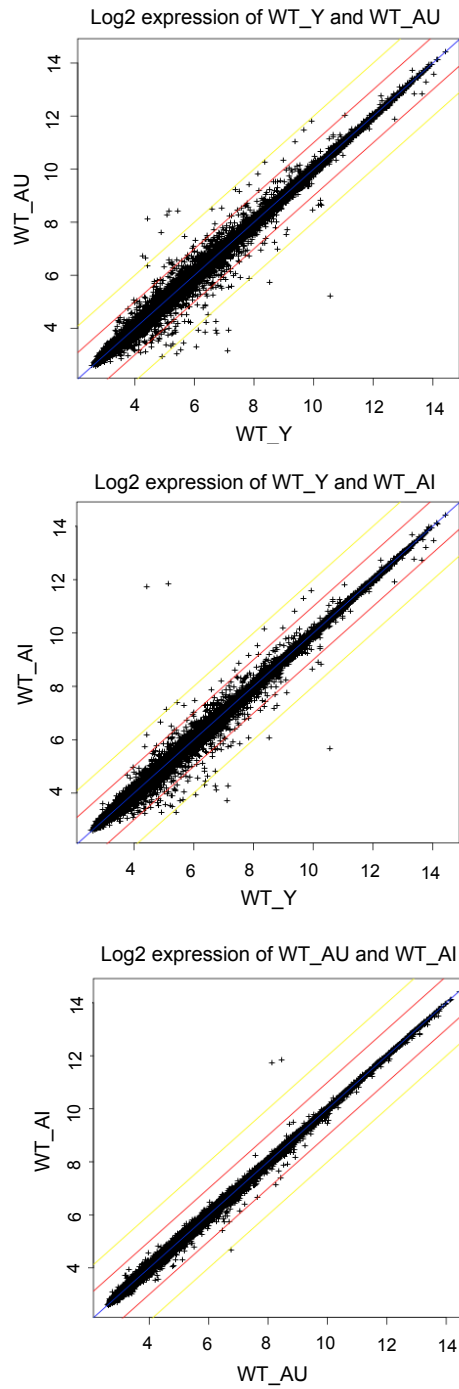

**Figure S2. Comparison of scatter plots of log intensity values (four replicates combined) for young and aged wild-type mice main comparisons.** WT\_AI (aged wild-type memory-impaired); WT\_AU (aged wild-type memory-unimpaired); WT\_Y (young wild-type). Blue line shows no change, red lines equal a 2-fold change, yellow lines are 4-fold

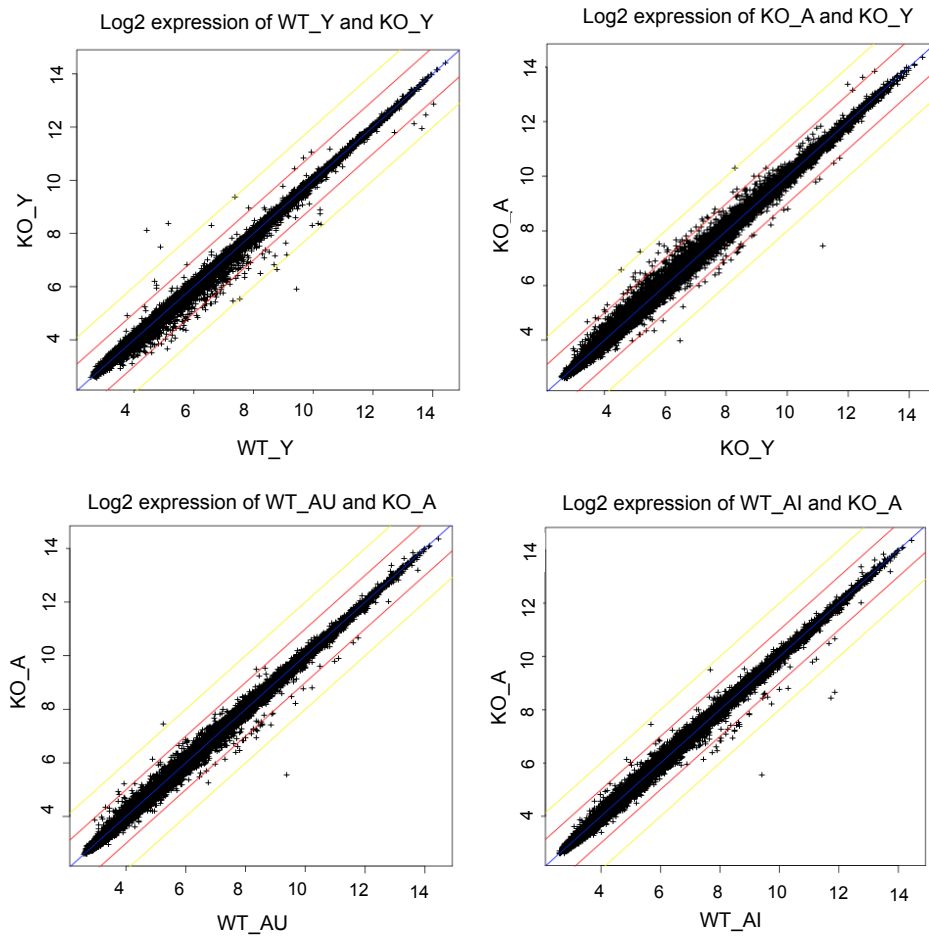

**Figure S3. Comparison of scatter plots of log intensity values (four replicates combined) for young and aged wild-type and 11 $\beta$ -HSD1-deficient mice main comparisons.**

WT\_AI (aged wild-type memory-impaired); WT\_AU (aged wild-type memory-unimpaired); WT\_Y (young wild-type); KO\_Y (young *Hsd11b1*<sup>-/-</sup>); KO\_A (aged *Hsd11b1*<sup>-/-</sup>)

Blue line shows no change, red lines equal a 2-fold change, yellow lines are 4-fold

## Supplementary Table S1

Hippocampal genes up-regulated with ageing in wild-type and 11 $\beta$ -HSD1-deficient mice but not affected by genotype. Gene expression level fold changes shown are from comparisons of aged (24 months) wild-type (WT\_A) mice (combined WT\_AU and WT\_AI mice) with corresponding young (6 months) wild-type (WT) or *Hsd11b1*<sup>-/-</sup> (KO) mice. \*, P<0.05, \*\*P<0.01, RP scores

| Affymetrix ID | Gene symbol      | Gene title                                                   | Fold change WT | Fold change KO |
|---------------|------------------|--------------------------------------------------------------|----------------|----------------|
| 1426508_at    | <i>Gfap</i>      | glial fibrillary acidic protein                              | 1.6 *          | 2 **           |
| 1449401_at    | <i>C1qc</i>      | complement component 1, q subcomponent, C chain              | 1.6 *          | 1.7 **         |
| 1417063_at    | <i>C1qb</i>      | complement component 1, q subcomponent, beta polypeptide     | 1.5 *          | 1.6 **         |
| 1419100_at    | <i>Serpina3n</i> | serine (or cysteine) peptidase inhibitor, clade A, member 3N | 2.0 *          | 1.8 *          |
| 1449254_at    | <i>Spp1</i>      | secreted phosphoprotein 1                                    | 1.7 *          | 1.6 *          |
| 1427371_at    | <i>Abca8a</i>    | ATP-binding cassette, sub-family A (ABC1), member 8a         | 1.6 **         | 1.8 **         |
| 1452428_a_at  | <i>B2m</i>       | beta-2 microglobulin                                         | 1.5 *          | 1.6 *          |
| 1418204_s_at  | <i>Aif1</i>      | allograft inflammatory factor 1                              | 1.5 *          | 1.7 **         |
| 1435477_s_at  | <i>Fcgr2b</i>    | Fc receptor, IgG, low affinity IIb                           | 1.9 *          | 2.0 **         |
| 1444564_at    | <i>Apod</i>      | apolipoprotein D                                             | 2.0 *          | 2.0 **         |
| 1450641_at    | <i>Vim</i>       | Vimentin                                                     | 1.6 *          | 1.8 **         |
| 1422640_at    | <i>Pcdhb9</i>    | protocadherin beta 9                                         | 2.0 **         | 1.9 **         |
| 1454268_a_at  | <i>Cyba</i>      | cytochrome b-245, alpha polypeptide                          | 1.6 *          | 1.8 **         |
| 1448620_at    | <i>Fcgr3</i>     | Fc receptor, IgG, low affinity III                           | 1.5 *          | 1.7 **         |
| 1460330_at    | <i>Anxa3</i>     | annexin A3                                                   | 1.4 *          | 1.6 **         |
| 1421792_s_at  | <i>Trem2</i>     | triggering receptor expressed on myeloid cells 2             | 1.5 **         | 1.5 *          |
| 1418580_at    | <i>Rtp4</i>      | receptor transporter protein 4                               | 2.0 *          | 2.0 **         |
| 1443745_s_at  | <i>Dmp1</i>      | dentin matrix protein 1                                      | 1.6 *          | 1.9 **         |
| 1423547_at    | <i>Lyz2</i>      | lysozyme 2                                                   | 2.9 **         | 2.4 *          |
| 1427076_at    | <i>Mpeg1</i>     | macrophage expressed gene 1                                  | 1.6 *          | 2.0 **         |
| 1450792_at    | <i>Tyrobp</i>    | TYRO protein tyrosine kinase binding protein                 | 1.6 *          | 1.8 **         |
| 1434342_at    | <i>S100b</i>     | S100 protein, beta polypeptide, neural                       | 1.2 *          | 1.7 **         |
